# Supplementary material for: NRAV, a newly identified Ferroptosis-related lncRNAs, affects the prognosis of hepatocellular carcinoma through the miR-375- 3P/SLC7A11 axis
Source: Research Square preprint supplement (doi:10.21203/rs.3.rs-1749498/v1), 2022-06-13
Supplement: Supplementary file 1 [file 0f278846807effa131a58489.xlsx]

## Sheet: Sheet1
Low risk	GS	SIZE	ES	NES	NOM p-val	FDR q-val	FWER p-val	RANK AT MAX	LEADING EDGE
1	follow link to MSigDB
2	KEGG_FATTY_ACID_METABOLISM	42	-0.84	-2.08	0	0.003	0.006	2656	tags=71%, list=5%, signal=75%
3	KEGG_PRIMARY_BILE_ACID_BIOSYNTHESIS	16	-0.93	-2.05	0	0.003	0.008	2275	tags=81%, list=4%, signal=85%
4	KEGG_RETINOL_METABOLISM	64	-0.68	-2.02	0	0.003	0.015	2632	tags=52%, list=5%, signal=54%
5	KEGG_PPAR_SIGNALING_PATHWAY	69	-0.62	-2	0	0.003	0.023	3175	tags=49%, list=6%, signal=52%
6	KEGG_COMPLEMENT_AND_COAGULATION_CASCADES	69	-0.71	-1.99	0	0.003	0.023	2582	tags=59%, list=5%, signal=62%
7	KEGG_TRYPTOPHAN_METABOLISM	40	-0.68	-1.96	0	0.004	0.035	1535	tags=50%, list=3%, signal=51%
8	KEGG_BUTANOATE_METABOLISM	34	-0.71	-1.91	0.002	0.005	0.059	1535	tags=50%, list=3%, signal=51%
9	KEGG_VALINE_LEUCINE_AND_ISOLEUCINE_DEGRADATION	44	-0.76	-1.89	0.004	0.006	0.076	2552	tags=59%, list=5%, signal=62%
10	KEGG_GLYCINE_SERINE_AND_THREONINE_METABOLISM	31	-0.72	-1.87	0.004	0.007	0.098	3299	tags=68%, list=6%, signal=72%
11	KEGG_METABOLISM_OF_XENOBIOTICS_BY_CYTOCHROME_P450	69	-0.59	-1.78	0.006	0.018	0.219	2632	tags=42%, list=5%, signal=44%
12	KEGG_LINOLEIC_ACID_METABOLISM	29	-0.57	-1.75	0.01	0.022	0.268	2264	tags=34%, list=4%, signal=36%
13	KEGG_BETA_ALANINE_METABOLISM	22	-0.67	-1.75	0.013	0.021	0.271	2552	tags=59%, list=5%, signal=62%
14	KEGG_PROPANOATE_METABOLISM	33	-0.67	-1.73	0.022	0.024	0.312	2552	tags=58%, list=5%, signal=60%
15	KEGG_PEROXISOME	78	-0.57	-1.73	0.012	0.023	0.328	2803	tags=46%, list=5%, signal=49%
16	KEGG_HISTIDINE_METABOLISM	29	-0.56	-1.72	0.014	0.023	0.338	2321	tags=48%, list=4%, signal=50%
17	KEGG_TYROSINE_METABOLISM	42	-0.52	-1.65	0.014	0.039	0.489	3860	tags=43%, list=7%, signal=46%
