# Supplementary material for: NRAV, a newly identified Ferroptosis-related lncRNAs, affects the prognosis of hepatocellular carcinoma through the miR-375- 3P/SLC7A11 axis
Source: Research Square preprint supplement (doi:10.21203/rs.3.rs-1749498/v1), 2022-06-13
Supplement: Supplementary file 2 [file 15b320bc929f02d942061efc.xlsx]

## Sheet: Sheet1
driver	suppressor	marker
RPL8	SLC7A11	PTGS2
IREB2	GPX4	DUSP1
ATP5MC3	AKR1C1	NOS2
CS	AKR1C2	NCF2
EMC2	AKR1C3	MT3
ACSF2	GPX4	UBC
NOX1	RB1	ALB
CYBB	HSPB1	TXNRD1
NOX3	HSF1	SRXN1
NOX4	SLC7A11	GPX2
NOX5	GPX4	BNIP3
DUOX1	GCLC	OXSR1
DUOX2	SLC7A11	SELENOS
G6PD	NFE2L2	ANGPTL7
PGD	SQSTM1	CHAC1
VDAC2	NQO1	SLC7A11
PIK3CA	HMOX1	DDIT4
FLT3	FTH1	LOC284561
SCP2	MUC1	ASNS
TP53	SLC3A2	TSC22D3
ACSL4	MT1G	DDIT3
LPCAT3	NFE2L2	JDP2
NRAS	SLC40A1	SESN2
KRAS	SLC7A11	SLC1A4
HRAS	GPX4	PCK2
TF	SLC7A11	TXNIP
TFRC	CISD1	VLDLR
TFR2	SLC7A11	GPT2
SLC38A1	FANCD2	PSAT1
SLC1A5	GPX4	LURAP1L
GLS2	NFE2L2	SLC7A5
GOT1	FTMT	HERPUD1
CARS1	HSPA5	XBP1
TP53	ATF4	ATF3
ALOX5	SLC7A11	SLC3A2
KEAP1	GPX4	CBS
HMOX1	GPX4	ATF4
TP53	HMOX1	ZNF419
TP53	ATF4	KLHL24
GLS2	NFE2L2	TRIB3
ATG5	TP53	ZFP69B
ATG7	SLC7A11	ATP6V1G2
NCOA4	HELLS	VEGFA
TF	SCD	GDF15
ALOX5	FADS2	TUBE1
ALOX12	SRC	ARRDC3
ALOX12B	STAT3	CEBPG
ALOX15	NFE2L2	SNORA16A
ALOX15B	PML	RGS4
ALOXE3	MTOR	BLOC1S5-TXNDC5
PHKG2	NFS1	LOC390705
TFRC	TP63	EIF2S1
ACO1	SLC7A11	KIM-1
IREB2	TP53	IL6
SLC38A1	CDKN1A	CXCL2
GLS2	MIR137	RELA
G6PDX	SLC40A1	HSD17B11
ULK1	GPX4	AGPAT3
ATG3	GPX4	SETD1B
ATG4D	ENPP2	HMOX1
ATG5	VDAC2	TF
BECN1	FH	FTL
MAP1LC3A	CISD2	RPL8
GABARAPL2	SLC40A1	ATP5MC3
GABARAPL1	MIR9-1	TFRC
ATG16L1	MIR9-2	MAFG
WIPI1	MIR9-3	IL33
WIPI2	CBS	FTH1
SNX4	NFE2L2	SLC40A1
ATG13	SQSTM1	TF
ULK2	GPX4	TFRC
NCOA4	ISCU	FTH1
ACSL4	FTH1	GPX4
TP53	ACSL3	HAMP
SAT1	OTUB1	HSPB1
ALOX15	CD44	NFE2L2
ACSL4	LINC00336	STEAP3
LPCAT3	STAT3	DRD5
ALOX15	BRD4	GPX4
ACSL4	PRDX6	DRD4
KEAP1	MIR17	MAP3K5
EGFR	SCD	MAPK14
NOX4	SESN2	SLC2A1
MAPK3	NF2	SLC2A3
MAPK1	ARNTL	SLC2A6
BID	HIF1A	SLC2A8
ACSL4	JUN	SLC2A12
ZEB1	CA9	GLUT13
KEAP1	HSPA5	SLC2A14
DPP4	TMBIM4	EIF2AK4
ALOX15	HSPA5	EIF2S1
ALOX12	PLIN2	ATF4
CDKN2A	MIR212	ALOX5
PEBP1	Fer1HCH	ALOX12
SOCS1	AIFM2	ALOX15
CDO1	AIFM2	ALOX5
MYB	LAMP2	ACSF2
HMOX1	ZFP36	IREB2
MAPK8	GPX4	GPX4
MAPK9	PROM2	HMGB1
MAPK1	CHMP5	HMOX1
MAPK3	CHMP6	NFE2L2
SLC1A5	AKR1C1	ELAVL1
CHAC1	AKR1C2	SLC3A2
MAPK14	AKR1C3	SLC7A11
LINC00472	CBS	TFAP2C
NOX4	NFE2L2	SP1
GOT1	CAV1	HBA1
BECN1	GCH1	NNMT
PRKAA2		PLIN4
PRKAA1		HIC1
ELAVL1		STMN1
BAP1		RRM2
TP53		CAPG
ABCC1		HNF4A
ACSL4		NGB
MIR6852		YWHAE
ACVR1B		GABPB1
TGFBR1		AURKA
BAP1		MIR4715
EPAS1		RIPK1
HILPDA		PRDX1
HIF1A		MIR30B
ALOX12
ACSL4
HMOX1
IFNG
ANO6
LPIN1
HMGB1
TNFAIP3
TLR4
NOX4
ATF3
ATM
YY1AP1
EGLN2
MIOX
TAZ
MTDH
IDH1
SIRT1
TAZ
BECN1
FBXW7
PANX1
DNAJB6
BACH1
ACSL4
LONP1
