# Supplementary material for: NRAV, a newly identified Ferroptosis-related lncRNAs, affects the prognosis of hepatocellular carcinoma through the miR-375- 3P/SLC7A11 axis
Source: Research Square preprint supplement (doi:10.21203/rs.3.rs-1749498/v1), 2022-06-13
Supplement: Supplementary file 3 [file 1928d1e02a4c05f723d8ce0c.xlsx]

## Sheet: Sheet1
gene	conMean	treatMean	logFC	pValue	fdr
SLC7A11	0.0301082	0.889909	4.88543	1.65466e-19	8.93515e-19
AKR1C1	27.5296	64.1935	1.22145	0.000384398	0.000512531
AKR1C2	16.2497	50.1002	1.62441	5.01125e-06	7.67681e-06
AKR1C3	17.683	83.414	2.23793	1.18324e-23	1.2779e-22
HSPB1	71.3546	339.067	2.24849	7.64893e-24	9.17871e-23
HSF1	6.46639	17.7451	1.45639	3.17318e-25	6.23097e-24
SQSTM1	29.9868	99.9176	1.73641	9.02019e-17	3.54248e-16
NQO1	1.45967	57.9538	5.31119	6.81872e-16	2.58394e-15
FTH1	139.099	286.486	1.04235	8.92719e-17	3.54248e-16
MT1G	1204.51	315.605	-1.93225	3.78444e-23	3.406e-22
FANCD2	0.131555	1.01643	2.94977	2.64972e-25	5.72339e-24
HSPA5	110.195	231.575	1.07142	1.03689e-19	5.89388e-19
HELLS	0.0938035	0.861082	3.19844	3.83929e-24	5.18304e-23
FADS2	9.64211	20.0576	1.05673	0.0111863	0.0132761
SRC	1.47643	5.36864	1.86244	2.15681e-10	4.70577e-10
PML	1.50235	3.13655	1.06196	9.28832e-18	4.36147e-17
TP63	0.0324914	0.121942	1.90806	0.00237048	0.00297688
ENPP2	4.15292	9.06023	1.12542	9.15986e-05	0.000128476
NF2	1.55921	3.96433	1.34626	2.04366e-24	2.94288e-23
PLIN2	127.362	62.5749	-1.02528	1.68011e-12	4.4803e-12
AIFM2	3.50635	9.47217	1.43372	4.81735e-21	3.35661e-20
ZFP36	164.714	57.4198	-1.52034	7.99658e-18	3.83836e-17
CAV1	4.22235	8.7237	1.04689	3.25018e-09	6.50037e-09
PTGS2	0.685695	0.20982	-1.70841	5.30649e-17	2.2924e-16
DUSP1	210.261	101.366	-1.05261	6.88476e-14	2.06543e-13
NOS2	0.0972624	0.402505	2.04905	5.20947e-13	1.5206e-12
NCF2	1.94716	4.04533	1.05489	0.0117892	0.0139151
MT3	0.0171549	0.505604	4.88132	0.000988025	0.00127792
ALB	34010.4	14088.9	-1.27141	6.52587e-21	4.40496e-20
TXNRD1	6.76314	28.1066	2.05514	1.93464e-17	8.70589e-17
SRXN1	0.361867	1.48891	2.04073	5.05613e-15	1.73353e-14
GPX2	106.985	267.704	1.32323	0.0100979	0.0121852
DDIT4	14.4734	30.4161	1.07143	6.49238e-05	9.22602e-05
ASNS	0.500574	2.5703	2.36028	2.42608e-09	4.8975e-09
DDIT3	9.15751	26.0193	1.50655	3.17612e-17	1.40008e-16
SLC1A4	1.91272	5.00649	1.38818	6.02663e-15	2.03399e-14
SLC7A5	2.46272	5.03757	1.03248	0.0263492	0.0305991
ATF3	20.5744	9.02973	-1.1881	1.06808e-11	2.62166e-11
ZNF419	0.285625	0.643774	1.17243	9.42743e-13	2.57763e-12
ZFP69B	0.135104	0.407536	1.59286	8.38869e-17	3.41879e-16
TUBE1	3.04622	1.32905	-1.19662	8.3329e-21	5.45426e-20
IL6	0.867032	0.320722	-1.43476	3.10172e-05	4.46648e-05
FTL	6020.63	12148.8	1.01283	7.27629e-07	1.19066e-06
RPL8	211.681	704.837	1.7354	4.54367e-21	3.27144e-20
TFRC	3.67961	10.991	1.5787	1.93422e-16	7.46058e-16
MAFG	1.05616	4.15899	1.97741	7.4264e-23	6.41641e-22
HAMP	148.253	15.9674	-3.21486	6.50719e-25	1.0812e-23
STEAP3	47.6772	21.8395	-1.12636	2.10621e-19	1.10961e-18
DRD4	0.155276	1.07583	2.79255	1.0577e-14	3.31107e-14
SLC2A1	0.680047	2.53401	1.89771	3.92036e-05	5.60793e-05
SLC2A6	0.920582	3.11068	1.75661	9.56692e-08	1.68005e-07
SLC2A14	0.0452823	0.17522	1.95215	0.00358376	0.00442338
ALOX12	0.109011	0.275266	1.33635	1.04005e-12	2.80812e-12
ALOX15	0.0219052	0.096189	2.1346	8.16438e-06	1.23322e-05
NNMT	469.383	140.667	-1.73849	1.1498e-17	5.28417e-17
STMN1	1.90256	13.5199	2.82907	1.89929e-27	1.02562e-25
RRM2	0.469399	6.3783	3.76429	3.17866e-26	1.14432e-24
CAPG	3.48688	13.1953	1.92002	1.94929e-11	4.52738e-11
AURKA	0.65543	6.89275	3.39456	4.05978e-28	2.92304e-26
CS	5.37879	13.8183	1.36123	1.45074e-22	1.20523e-21
EMC2	4.26184	9.93217	1.22063	4.52047e-24	5.74366e-23
NOX1	0.146418	0.415607	1.50512	9.69614e-15	3.17328e-14
NOX4	0.0216366	0.24261	3.4871	1.94152e-28	2.09684e-26
NOX5	0.00304716	0.0127574	2.0658	2.61673e-05	3.84499e-05
DUOX1	0.0569322	0.494106	3.1175	5.88354e-20	3.53012e-19
G6PD	1.31171	13.5821	3.37219	6.02671e-25	1.0812e-23
ACSL4	7.32149	46.1219	2.65524	3.57418e-12	9.08263e-12
NRAS	5.76946	11.9025	1.04476	7.64046e-17	3.17373e-16
HRAS	4.52107	13.5674	1.5854	7.5853e-25	1.1703e-23
SLC38A1	1.29373	4.37665	1.75829	2.99873e-05	4.34715e-05
SLC1A5	2.72912	8.79615	1.68844	0.00412299	0.00505103
GLS2	4.77871	1.7868	-1.41924	1.24398e-15	4.63275e-15
ALOX15B	0.142067	1.81789	3.67762	7.72369e-07	1.25437e-06
MAPK3	3.65701	9.50819	1.37851	5.73089e-26	1.76839e-24
CDKN2A	0.162719	4.09759	4.65432	1.87e-25	4.48801e-24
MYB	0.0463979	0.13344	1.52406	7.28782e-08	1.2903e-07
PRKAA2	0.279372	1.62845	2.54324	2.29901e-10	4.96585e-10
BAP1	7.27858	15.1878	1.06118	1.67524e-23	1.7231e-22
ABCC1	0.707154	2.38037	1.75109	3.82189e-06	5.93905e-06
YY1AP1	3.83637	9.08909	1.24439	1.04477e-23	1.18773e-22
EGLN2	1.59681	3.78929	1.24673	1.96154e-20	1.21055e-19
MIOX	0.0253075	0.730526	4.8513	1.25034e-11	3.03452e-11
TAZ	1.72355	5.52082	1.6795	7.51676e-29	1.62362e-26
DNAJB6	1.46502	3.29309	1.16853	2.67946e-26	1.14432e-24
