# Supplementary material for: NRAV, a newly identified Ferroptosis-related lncRNAs, affects the prognosis of hepatocellular carcinoma through the miR-375- 3P/SLC7A11 axis
Source: Research Square preprint supplement (doi:10.21203/rs.3.rs-1749498/v1), 2022-06-13
Supplement: Supplementary file 4 [file 49ec52226a8440ef0ff06754.docx]

Table S2. The sequences (5'-3') of primers and shRNA target sequences related to methods.

| NRAV-F(homo） | 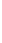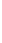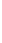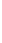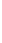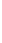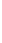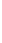ACAATGTGAGGATTAAGTGAGATGA |
| --- | --- |
| NRAV-R(homo） | AAGGTGAATAGTGCCAAGGTT |
| miR-375-F(homo） | AAGCTTTGTTCGTTCGGCTC |
| miR-375-R(homo） | GTATCCAGTGCGAATACCTC |
| SLC7A11-F(homo） | TCTCCAAAGGAGGTTACCTGC |
| SLC7A11-R(homo） | AGACTCCCCTCAGTAAAGTGAC |
| GAPDH-F(homo） | TGTGGGCATCAATGGATTTGG |
| GAPDH-R(homo） | ACACCATGTATTCCGGGTCAAT |
| LINC01224-F(homo） | AGAGCTTGGGATCGCTTTCTG |
| LINC01224-R(homo） | TTACTCAGGTGCCTTTCCCAC |
| MKLN1-AS-F(homo） | ACTGGGTCTGAGGTGTAAGC |
| MKLN1-AS-R(homo） | TGATGACACTGTCCAGGCTT |
| sh1-NRAV target sequence | GAGGTTCAAAGAGATGAAGTC |
| sh2-NRAV target sequence | GGTCTGACTCTACAGTCCCAC |
| sh3-NRAV target sequence | GGAGCAGTTAGAGGCTATTGC |
| shNC-NRAV target sequence | TTCTCCGAACGTGTCACGT |
