# Supplementary material for: NRAV, a newly identified Ferroptosis-related lncRNAs, affects the prognosis of hepatocellular carcinoma through the miR-375- 3P/SLC7A11 axis
Source: Research Square preprint supplement (doi:10.21203/rs.3.rs-1749498/v1), 2022-06-13
Supplement: Supplementary file 5 [file 4c4486e6defca3e8c63eff35.xlsx]

## Sheet: Sheet1
								id	coef	HR	HR.95L	HR.95H	pvalue
								AL671710.1	-2.21142	0.109545	0.0228204	0.525845	0.00572659
								AC099850.3	0.0933078	1.0978	1.008	1.19559	0.0321068
								AL031985.3	0.295286	1.34351	0.925777	1.94974	0.120167
								NRAV	0.180793	1.19817	1.011	1.41999	0.0369622
								AC012615.1	0.264263	1.30247	1.04458	1.62403	0.0189041
								AC008549.1	-0.0219129	0.978325	0.963653	0.993221	0.00448101
								`BACE1-AS`	0.139823	1.15007	0.964827	1.37088	0.118672
								AC105118.1	0.0158428	1.01597	1.00575	1.02629	0.00212447
								`PTOV1-AS1`	-0.453963	0.635106	0.440338	0.916022	0.0151254
								`ZFPM2-AS1`	0.0453584	1.0464	0.993492	1.10213	0.0866502
								SNHG4	0.330051	1.39104	1.02571	1.88649	0.0337314
								LINC00942	0.0193504	1.01954	0.997341	1.04223	0.0849081
								AL049840.3	0.37256	1.45145	0.91503	2.30232	0.113484
								LINC01224	0.359648	1.43283	0.965295	2.1268	0.0743119
								`KDM4A-AS1`	0.569822	1.76795	1.00203	3.11933	0.0491875
								AC091057.1	-1.94296	0.143279	0.0380805	0.539089	0.00405471
								`SREBF2-AS1`	0.443179	1.55765	1.05017	2.31036	0.0275702
								`MKLN1-AS`	0.880498	2.4121	1.4093	4.12846	0.00132163
								`FAM111A-DT`	-0.465586	0.627767	0.36408	1.08243	0.0939343
