# Supplementary material for: NRAV, a newly identified Ferroptosis-related lncRNAs, affects the prognosis of hepatocellular carcinoma through the miR-375- 3P/SLC7A11 axis
Source: Research Square preprint supplement (doi:10.21203/rs.3.rs-1749498/v1), 2022-06-13
Supplement: Supplementary file 6 [file 743591fa992de3dfbcbfc865.docx]

**Figure S3.** **A-B**.Gene enrichment analysis. **C**.Heatmap for immune responses based on CIBERSORT, ESTIMATE, quanTIseq, xCell, MCP-counter, EPIC, and TIMER algorithms among the high and low-risk group. **D**. The correlation between immune cell subpopulations and related functions were evaluated using ssGSEA. **E**. Expression of common immune checkpoints between the high and low-risk HCC patients.

**Figure S4. A-D.** Overall survival and DFS of HCC patients (N=362) from TCGA project with high or low LINC01224 and MKLN1-AS expression levels. **E**. The protein-coding potential analysis of NRAV was performed using the ORF finder from NCBI. **F**. Using CPC 2.0 to predict the coding capability of NRAV.
