# Supplementary material for: NRAV, a newly identified Ferroptosis-related lncRNAs, affects the prognosis of hepatocellular carcinoma through the miR-375- 3P/SLC7A11 axis
Source: Research Square preprint supplement (doi:10.21203/rs.3.rs-1749498/v1), 2022-06-13
Supplement: Supplementary file 7 [file b88800bc5c2efdff6430c015.xlsx]

## Sheet: Sheet1
ID	Description	GeneRatio	BgRatio	pvalue	p.adjust	qvalue	geneID	Count
hsa04216	Ferroptosis	7/69	41/8105	4.24467e-08	9.25339e-06	6.29999e-06	SLC7A11/FTH1/FTL/TFRC/STEAP3/ALOX15/ACSL4	7
hsa05230	Central carbon metabolism in cancer	8/69	70/8105	1.13035e-07	1.23208e-05	8.38836e-06	SLC7A5/SLC2A1/G6PD/NRAS/HRAS/SLC1A5/GLS2/MAPK3	8
hsa04726	Serotonergic synapse	8/69	115/8105	5.23138e-06	0.000380147	0.000258816	PTGS2/DUSP1/ALOX12/ALOX15/NRAS/HRAS/ALOX15B/MAPK3	8
hsa04370	VEGF signaling pathway	6/69	59/8105	9.64458e-06	0.000511324	0.000348125	HSPB1/SRC/PTGS2/NRAS/HRAS/MAPK3	6
hsa00590	Arachidonic acid metabolism	6/69	61/8105	1.17276e-05	0.000511324	0.000348125	AKR1C3/PTGS2/GPX2/ALOX12/ALOX15/ALOX15B	6
hsa05418	Fluid shear stress and atherosclerosis	8/69	139/8105	2.11823e-05	0.000710569	0.000483777	SQSTM1/NQO1/SRC/CAV1/DUSP1/NCF2/NOX1/PRKAA2	8
hsa05219	Bladder cancer	5/69	41/8105	2.28164e-05	0.000710569	0.000483777	SRC/NRAS/HRAS/MAPK3/CDKN2A	5
hsa05417	Lipid and atherosclerosis	9/69	215/8105	7.82896e-05	0.00213339	0.00145248	HSPA5/SRC/NCF2/DDIT3/IL6/NOX1/NRAS/HRAS/MAPK3	9
hsa04933	AGE-RAGE signaling pathway in diabetic complications	6/69	100/8105	0.00019411	0.00470179	0.00320112	IL6/NOX1/NOX4/NRAS/HRAS/MAPK3	6
hsa04625	C-type lectin receptor signaling pathway	6/69	104/8105	0.000240589	0.00517077	0.00352042	SRC/PTGS2/IL6/NRAS/HRAS/MAPK3	6
hsa05206	MicroRNAs in cancer	10/69	310/8105	0.000265225	0.00517077	0.00352042	TP63/PTGS2/DDIT4/STMN1/NRAS/HRAS/GLS2/MAPK3/CDKN2A/ABCC1	10
hsa05211	Renal cell carcinoma	5/69	69/8105	0.00028463	0.00517077	0.00352042	SLC2A1/NRAS/HRAS/MAPK3/EGLN2	5
hsa04066	HIF-1 signaling pathway	6/69	109/8105	0.000310562	0.00520788	0.00354569	NOS2/IL6/TFRC/SLC2A1/MAPK3/EGLN2	6
hsa01521	EGFR tyrosine kinase inhibitor resistance	5/69	79/8105	0.000534534	0.00832345	0.00566686	SRC/IL6/NRAS/HRAS/MAPK3	5
hsa05022	Pathways of neurodegeneration - multiple diseases	12/69	475/8105	0.000589552	0.00856815	0.00583346	SQSTM1/HSPA5/PTGS2/NOS2/GPX2/DDIT3/IL6/NOX1/NOX4/NRAS/HRAS/MAPK3	12
hsa04140	Autophagy - animal	6/69	137/8105	0.00104616	0.014254	0.00970454	SQSTM1/DDIT4/NRAS/HRAS/MAPK3/PRKAA2	6
hsa05167	Kaposi sarcoma-associated herpesvirus infection	7/69	193/8105	0.00120611	0.0154666	0.0105301	SRC/ZFP36/PTGS2/IL6/NRAS/HRAS/MAPK3	7
hsa01522	Endocrine resistance	5/69	98/8105	0.00142214	0.0172237	0.0117264	SRC/NRAS/HRAS/MAPK3/CDKN2A	5
hsa04921	Oxytocin signaling pathway	6/69	154/8105	0.00190869	0.020192	0.0137474	SRC/PTGS2/NRAS/HRAS/MAPK3/PRKAA2	6
hsa04150	mTOR signaling pathway	6/69	155/8105	0.00197241	0.020192	0.0137474	DDIT4/SLC7A5/NRAS/HRAS/MAPK3/PRKAA2	6
hsa01523	Antifolate resistance	3/69	30/8105	0.00203375	0.020192	0.0137474	IL6/ALOX12/ABCC1	3
hsa04218	Cellular senescence	6/69	156/8105	0.00203773	0.020192	0.0137474	SQSTM1/IL6/NRAS/HRAS/MAPK3/CDKN2A	6
hsa05221	Acute myeloid leukemia	4/69	67/8105	0.00246356	0.0225896	0.0153797	PML/NRAS/HRAS/MAPK3	4
hsa05166	Human T-cell leukemia virus 1 infection	7/69	219/8105	0.00248693	0.0225896	0.0153797	ZFP36/IL6/SLC2A1/NRAS/HRAS/MAPK3/CDKN2A	7
hsa04137	Mitophagy - animal	4/69	68/8105	0.00260092	0.02268	0.0154413	SQSTM1/SRC/NRAS/HRAS	4
hsa04917	Prolactin signaling pathway	4/69	70/8105	0.00289128	0.0229443	0.0156212	SRC/NRAS/HRAS/MAPK3	4
hsa05163	Human cytomegalovirus infection	7/69	225/8105	0.00289411	0.0229443	0.0156212	SRC/PTGS2/IL6/NRAS/HRAS/MAPK3/CDKN2A	7
hsa05225	Hepatocellular carcinoma	6/69	168/8105	0.00295612	0.0229443	0.0156212	NQO1/TXNRD1/NRAS/HRAS/MAPK3/CDKN2A	6
hsa05218	Melanoma	4/69	72/8105	0.00320311	0.0229443	0.0156212	NRAS/HRAS/MAPK3/CDKN2A	4
hsa05223	Non-small cell lung cancer	4/69	72/8105	0.00320311	0.0229443	0.0156212	NRAS/HRAS/MAPK3/CDKN2A	4
hsa04115	p53 signaling pathway	4/69	73/8105	0.00336732	0.0229443	0.0156212	AIFM2/STEAP3/RRM2/CDKN2A	4
hsa04919	Thyroid hormone signaling pathway	5/69	121/8105	0.00358194	0.0229443	0.0156212	SRC/SLC2A1/NRAS/HRAS/MAPK3	5
hsa04918	Thyroid hormone synthesis	4/69	75/8105	0.00371278	0.0229443	0.0156212	HSPA5/ALB/GPX2/DUOX1	4
hsa05214	Glioma	4/69	75/8105	0.00371278	0.0229443	0.0156212	NRAS/HRAS/MAPK3/CDKN2A	4
hsa05216	Thyroid cancer	3/69	37/8105	0.00373029	0.0229443	0.0156212	NRAS/HRAS/MAPK3	3
hsa05010	Alzheimer disease	9/69	369/8105	0.00384293	0.0229443	0.0156212	PTGS2/NOS2/DDIT3/IL6/NOX1/NOX4/NRAS/HRAS/MAPK3	9
hsa05220	Chronic myeloid leukemia	4/69	76/8105	0.00389422	0.0229443	0.0156212	NRAS/HRAS/MAPK3/CDKN2A	4
hsa05140	Leishmaniasis	4/69	77/8105	0.00408158	0.0234154	0.0159419	PTGS2/NOS2/NCF2/MAPK3	4
hsa04926	Relaxin signaling pathway	5/69	129/8105	0.00470714	0.0263117	0.0179138	SRC/NOS2/NRAS/HRAS/MAPK3	5
hsa04068	FoxO signaling pathway	5/69	131/8105	0.00502376	0.0273795	0.0186408	IL6/NRAS/HRAS/MAPK3/PRKAA2	5
hsa04012	ErbB signaling pathway	4/69	85/8105	0.00580452	0.0308631	0.0210125	SRC/NRAS/HRAS/MAPK3	4
hsa04371	Apelin signaling pathway	5/69	137/8105	0.00606433	0.0314767	0.0214303	NOS2/NRAS/HRAS/MAPK3/PRKAA2	5
hsa04540	Gap junction	4/69	88/8105	0.00655896	0.0332524	0.0226392	SRC/NRAS/HRAS/MAPK3	4
hsa04912	GnRH signaling pathway	4/69	93/8105	0.00795635	0.0394201	0.0268384	SRC/NRAS/HRAS/MAPK3	4
hsa05161	Hepatitis B	5/69	162/8105	0.0120547	0.0575072	0.0391527	SRC/IL6/NRAS/HRAS/MAPK3	5
hsa04010	MAPK signaling pathway	7/69	294/8105	0.0121345	0.0575072	0.0391527	HSPB1/DUSP1/DDIT3/STMN1/NRAS/HRAS/MAPK3	7
hsa00480	Glutathione metabolism	3/69	57/8105	0.0124488	0.0577411	0.0393119	GPX2/RRM2/G6PD	3
hsa05213	Endometrial cancer	3/69	58/8105	0.013049	0.0592643	0.0403489	NRAS/HRAS/MAPK3	3
hsa04730	Long-term depression	3/69	60/8105	0.0142986	0.0623419	0.0424442	NRAS/HRAS/MAPK3	3
hsa04978	Mineral absorption	3/69	60/8105	0.0142986	0.0623419	0.0424442	FTH1/MT1G/FTL	3
hsa00220	Arginine biosynthesis	2/69	22/8105	0.0147837	0.0626668	0.0426655	NOS2/GLS2	2
hsa00140	Steroid hormone biosynthesis	3/69	61/8105	0.014948	0.0626668	0.0426655	AKR1C1/AKR1C2/AKR1C3	3
hsa04213	Longevity regulating pathway - multiple species	3/69	62/8105	0.015614	0.0642236	0.0437254	NRAS/HRAS/PRKAA2	3
hsa04929	GnRH secretion	3/69	64/8105	0.0169956	0.0686118	0.046713	NRAS/HRAS/MAPK3	3
hsa04071	Sphingolipid signaling pathway	4/69	119/8105	0.018363	0.0727842	0.0495537	NRAS/HRAS/MAPK3/ABCC1	4
