# Supplementary material for: NRAV, a newly identified Ferroptosis-related lncRNAs, affects the prognosis of hepatocellular carcinoma through the miR-375- 3P/SLC7A11 axis
Source: Research Square preprint supplement (doi:10.21203/rs.3.rs-1749498/v1), 2022-06-13
Supplement: Supplementary file 8 [file e5cd366aac9366024f397ec1.xlsx]

## Sheet: Sheet1
High risk	GS DETAILS follow link to MSigDB	ES	NES	NOM p-val	FDR q-val	FWER p-val	RANK AT MAX	LEADING EDGE
1	KEGG_PURINE_METABOLISM	159	0.59	2.12	0	0.005	0.002	12374	tags=56%, list=22%, signal=72%
2	KEGG_UBIQUITIN_MEDIATED_PROTEOLYSIS	135	0.71	2.12	0	0.002	0.002	9608	tags=67%, list=17%, signal=80%
3	KEGG_OOCYTE_MEIOSIS	113	0.67	2.12	0	0.002	0.002	10850	tags=66%, list=20%, signal=82%
4	KEGG_HOMOLOGOUS_RECOMBINATION	28	0.83	2.04	0	0.005	0.009	4687	tags=75%, list=8%, signal=82%
5	KEGG_PYRIMIDINE_METABOLISM	98	0.63	2.04	0	0.004	0.011	11824	tags=64%, list=21%, signal=82%
6	KEGG_RNA_DEGRADATION	59	0.71	2.01	0	0.004	0.012	12130	tags=78%, list=22%, signal=100%
7	KEGG_VIBRIO_CHOLERAE_INFECTION	54	0.64	2.01	0	0.004	0.012	14610	tags=74%, list=26%, signal=101%
8	KEGG_CELL_CYCLE	125	0.72	2	0	0.003	0.012	9006	tags=72%, list=16%, signal=86%
9	KEGG_SPLICEOSOME	127	0.76	1.98	0	0.005	0.018	6754	tags=74%, list=12%, signal=84%
10	KEGG_EPITHELIAL_CELL_SIGNALING_IN_HELICOBACTER_PYLORI_INFECTION	68	0.64	1.96	0	0.007	0.027	13455	tags=69%, list=24%, signal=91%
11	KEGG_ENDOCYTOSIS	181	0.59	1.94	0	0.009	0.034	9641	tags=50%, list=17%, signal=60%
12	KEGG_MTOR_SIGNALING_PATHWAY	52	0.64	1.93	0	0.009	0.034	13609	tags=71%, list=25%, signal=94%
13	KEGG_N_GLYCAN_BIOSYNTHESIS	46	0.65	1.93	0	0.008	0.034	6537	tags=50%, list=12%, signal=57%
14	KEGG_PATHWAYS_IN_CANCER	325	0.56	1.92	0	0.009	0.045	14989	tags=58%, list=27%, signal=78%
15	KEGG_MISMATCH_REPAIR	23	0.82	1.91	0	0.01	0.048	6299	tags=78%, list=11%, signal=88%
16	KEGG_PROGESTERONE_MEDIATED_OOCYTE_MATURATION	85	0.62	1.91	0	0.009	0.049	13609	tags=67%, list=25%, signal=89%
17	KEGG_LYSOSOME	121	0.6	1.91	0.002	0.009	0.051	12538	tags=60%, list=23%, signal=78%
18	KEGG_VASOPRESSIN_REGULATED_WATER_REABSORPTION	44	0.66	1.89	0.002	0.01	0.064	12063	tags=70%, list=22%, signal=90%
19	KEGG_SNARE_INTERACTIONS_IN_VESICULAR_TRANSPORT	38	0.64	1.89	0.002	0.01	0.065	10787	tags=63%, list=20%, signal=78%
20	KEGG_BASE_EXCISION_REPAIR	35	0.72	1.89	0	0.01	0.067	11157	tags=71%, list=20%, signal=89%
21	KEGG_WNT_SIGNALING_PATHWAY	151	0.58	1.88	0	0.01	0.072	13606	tags=56%, list=25%, signal=74%
22	KEGG_NEUROTROPHIN_SIGNALING_PATHWAY	126	0.61	1.88	0	0.01	0.074	12170	tags=61%, list=22%, signal=78%
23	KEGG_PATHOGENIC_ESCHERICHIA_COLI_INFECTION	56	0.66	1.88	0	0.01	0.076	12328	tags=71%, list=22%, signal=92%
24	KEGG_BASAL_TRANSCRIPTION_FACTORS	35	0.68	1.87	0	0.011	0.078	10242	tags=69%, list=19%, signal=84%
25	KEGG_COLORECTAL_CANCER	62	0.64	1.86	0	0.011	0.086	14211	tags=69%, list=26%, signal=93%
26	KEGG_AMINOACYL_TRNA_BIOSYNTHESIS	41	0.7	1.86	0.006	0.011	0.087	5144	tags=61%, list=9%, signal=67%
27	KEGG_FC_GAMMA_R_MEDIATED_PHAGOCYTOSIS	96	0.63	1.86	0	0.012	0.097	16568	tags=78%, list=30%, signal=111%
28	KEGG_RENAL_CELL_CARCINOMA	70	0.63	1.86	0	0.011	0.098	13609	tags=67%, list=25%, signal=89%
29	KEGG_PANCREATIC_CANCER	70	0.65	1.86	0.002	0.011	0.1	14968	tags=73%, list=27%, signal=100%
30	KEGG_INOSITOL_PHOSPHATE_METABOLISM	54	0.64	1.86	0.002	0.011	0.1	14113	tags=70%, list=26%, signal=94%
31	KEGG_RIG_I_LIKE_RECEPTOR_SIGNALING_PATHWAY	71	0.57	1.84	0	0.012	0.115	10718	tags=46%, list=19%, signal=58%
32	KEGG_ENDOMETRIAL_CANCER	52	0.62	1.84	0.004	0.012	0.116	13609	tags=65%, list=25%, signal=87%
33	KEGG_ERBB_SIGNALING_PATHWAY	87	0.59	1.84	0	0.012	0.124	15306	tags=66%, list=28%, signal=90%
34	KEGG_NUCLEOTIDE_EXCISION_REPAIR	44	0.69	1.84	0	0.012	0.127	11700	tags=70%, list=21%, signal=89%
35	KEGG_NON_SMALL_CELL_LUNG_CANCER	54	0.61	1.84	0.002	0.012	0.129	14921	tags=65%, list=27%, signal=89%
36	KEGG_DNA_REPLICATION	36	0.8	1.83	0	0.013	0.145	6299	tags=78%, list=11%, signal=88%
37	KEGG_GLYCOSYLPHOSPHATIDYLINOSITOL_GPI_ANCHOR_BIOSYNTHESIS	25	0.67	1.83	0.006	0.013	0.149	8293	tags=64%, list=15%, signal=75%
38	KEGG_RNA_POLYMERASE	29	0.7	1.83	0	0.013	0.151	10021	tags=66%, list=18%, signal=80%
39	KEGG_NOD_LIKE_RECEPTOR_SIGNALING_PATHWAY	62	0.62	1.82	0.006	0.013	0.161	14968	tags=73%, list=27%, signal=99%
40	KEGG_NOTCH_SIGNALING_PATHWAY	47	0.64	1.82	0	0.013	0.165	12447	tags=68%, list=23%, signal=88%
41	KEGG_ACUTE_MYELOID_LEUKEMIA	57	0.6	1.82	0.006	0.013	0.166	13751	tags=63%, list=25%, signal=84%
42	KEGG_LONG_TERM_DEPRESSION	70	0.55	1.81	0	0.013	0.168	15126	tags=54%, list=27%, signal=75%
43	KEGG_BLADDER_CANCER	42	0.61	1.81	0	0.013	0.168	15190	tags=62%, list=27%, signal=85%
44	KEGG_APOPTOSIS	87	0.58	1.81	0.002	0.013	0.174	15810	tags=66%, list=29%, signal=92%
45	KEGG_THYROID_CANCER	29	0.65	1.81	0.006	0.013	0.183	13557	tags=66%, list=25%, signal=87%
46	KEGG_REGULATION_OF_AUTOPHAGY	35	0.57	1.8	0.004	0.013	0.192	8802	tags=37%, list=16%, signal=44%
47	KEGG_VEGF_SIGNALING_PATHWAY	76	0.54	1.8	0	0.013	0.193	15033	tags=57%, list=27%, signal=78%
48	KEGG_CHRONIC_MYELOID_LEUKEMIA	73	0.62	1.8	0	0.014	0.199	14968	tags=71%, list=27%, signal=98%
49	KEGG_PHOSPHATIDYLINOSITOL_SIGNALING_SYSTEM	76	0.6	1.8	0.002	0.013	0.199	14299	tags=64%, list=26%, signal=87%
50	KEGG_SMALL_CELL_LUNG_CANCER	84	0.6	1.8	0.002	0.014	0.201	9608	tags=51%, list=17%, signal=62%
51	KEGG_MAPK_SIGNALING_PATHWAY	267	0.51	1.79	0	0.014	0.206	15190	tags=55%, list=27%, signal=76%
52	KEGG_MELANOGENESIS	101	0.54	1.79	0	0.014	0.206	11972	tags=48%, list=22%, signal=61%
53	KEGG_LONG_TERM_POTENTIATION	70	0.56	1.79	0	0.013	0.206	11260	tags=51%, list=20%, signal=64%
54	KEGG_REGULATION_OF_ACTIN_CYTOSKELETON	213	0.54	1.79	0.004	0.014	0.208	13609	tags=55%, list=25%, signal=73%
55	KEGG_GNRH_SIGNALING_PATHWAY	101	0.54	1.79	0	0.014	0.216	15126	tags=59%, list=27%, signal=82%
56	KEGG_OTHER_GLYCAN_DEGRADATION	16	0.69	1.77	0.01	0.016	0.237	6329	tags=50%, list=11%, signal=56%
57	KEGG_FC_EPSILON_RI_SIGNALING_PATHWAY	79	0.54	1.77	0.004	0.016	0.242	15033	tags=57%, list=27%, signal=78%
58	KEGG_TOLL_LIKE_RECEPTOR_SIGNALING_PATHWAY	102	0.55	1.76	0.006	0.016	0.256	14009	tags=51%, list=25%, signal=68%
59	KEGG_ADHERENS_JUNCTION	73	0.6	1.76	0.004	0.016	0.257	9200	tags=52%, list=17%, signal=62%
60	KEGG_PROTEIN_EXPORT	24	0.65	1.76	0.01	0.016	0.259	13894	tags=71%, list=25%, signal=95%
61	KEGG_GLIOMA	65	0.55	1.74	0.002	0.019	0.289	14921	tags=60%, list=27%, signal=82%
62	KEGG_INSULIN_SIGNALING_PATHWAY	137	0.5	1.74	0.002	0.018	0.289	13218	tags=55%, list=24%, signal=72%
63	KEGG_GAP_JUNCTION	90	0.55	1.74	0.002	0.019	0.292	13352	tags=58%, list=24%, signal=76%
64	KEGG_PROSTATE_CANCER	89	0.54	1.73	0.004	0.02	0.3	14968	tags=61%, list=27%, signal=83%
65	KEGG_P53_SIGNALING_PATHWAY	68	0.53	1.73	0.002	0.02	0.307	10201	tags=47%, list=18%, signal=58%
66	KEGG_FOCAL_ADHESION	199	0.54	1.72	0.012	0.021	0.319	14989	tags=56%, list=27%, signal=76%
67	KEGG_CYTOSOLIC_DNA_SENSING_PATHWAY	55	0.56	1.7	0.006	0.025	0.354	10486	tags=40%, list=19%, signal=49%
68	KEGG_TGF_BETA_SIGNALING_PATHWAY	86	0.55	1.69	0.01	0.026	0.366	15183	tags=58%, list=27%, signal=80%
69	KEGG_PENTOSE_PHOSPHATE_PATHWAY	27	0.57	1.69	0.014	0.027	0.378	6433	tags=37%, list=12%, signal=42%
70	KEGG_AXON_GUIDANCE	129	0.53	1.68	0.014	0.03	0.398	20194	tags=71%, list=37%, signal=111%
71	KEGG_GLYCOSAMINOGLYCAN_BIOSYNTHESIS_KERATAN_SULFATE	15	0.65	1.66	0.01	0.033	0.422	13707	tags=67%, list=25%, signal=89%
72	KEGG_HUNTINGTONS_DISEASE	182	0.49	1.66	0.039	0.034	0.434	7840	tags=34%, list=14%, signal=39%
73	KEGG_RIBOFLAVIN_METABOLISM	16	0.62	1.65	0.022	0.036	0.45	8805	tags=56%, list=16%, signal=67%
74	KEGG_GLYCOSPHINGOLIPID_BIOSYNTHESIS_GANGLIO_SERIES	15	0.61	1.65	0.032	0.037	0.463	4257	tags=40%, list=8%, signal=43%
75	KEGG_LEUKOCYTE_TRANSENDOTHELIAL_MIGRATION	116	0.5	1.63	0.024	0.041	0.495	14299	tags=52%, list=26%, signal=70%
76	KEGG_TIGHT_JUNCTION	132	0.48	1.63	0.01	0.043	0.516	14567	tags=46%, list=26%, signal=63%
77	KEGG_CHEMOKINE_SIGNALING_PATHWAY	188	0.5	1.62	0.04	0.046	0.544	14968	tags=55%, list=27%, signal=75%
78	KEGG_PROTEASOME	46	0.64	1.61	0.057	0.046	0.546	9188	tags=54%, list=17%, signal=65%
79	KEGG_AMINO_SUGAR_AND_NUCLEOTIDE_SUGAR_METABOLISM	44	0.51	1.61	0.027	0.048	0.568	9875	tags=48%, list=18%, signal=58%
