# Supplementary material for: NRAV, a newly identified Ferroptosis-related lncRNAs, affects the prognosis of hepatocellular carcinoma through the miR-375- 3P/SLC7A11 axis
Source: Research Square preprint supplement (doi:10.21203/rs.3.rs-1749498/v1), 2022-06-13
Supplement: Supplementary file 9 [file f942fed00c38ba63c708787c.xlsx]

## Sheet: Sheet1
gene	HR	HR.95L	HR.95H	pvalue
AC026401.3	1.08611	1.03843	1.13599	0.000310758
AC092115.3	1.34526	1.03766	1.74404	0.0251519
AL671710.1	2.69436	1.35926	5.34084	0.0045227
AC099850.3	1.14451	1.09263	1.19885	1.17564e-08
AC002116.2	1.55871	1.12176	2.16586	0.0081798
AL031985.3	1.87921	1.54689	2.28294	2.10454e-10
NRAV	1.2347	1.1296	1.34959	3.40826e-06
AC012615.1	1.1882	1.00897	1.39928	0.0387385
PXN-AS1	1.17902	1.03794	1.33927	0.0113212
AL049840.4	1.43724	1.02431	2.01664	0.0358215
AC008549.1	0.984079	0.971506	0.996814	0.0144333
AC107959.3	1.34887	1.13808	1.59871	0.000556876
AC087741.2	1.13517	1.04211	1.23654	0.00367137
PITPNA-AS1	1.07302	1.0165	1.13269	0.0106944
AC022007.1	1.56619	1.12677	2.17699	0.00757738
GAS5	1.00505	1.00023	1.00989	0.0401917
BACE1-AS	1.21334	1.09954	1.33892	0.000118829
MAPKAPK5-AS1	1.06525	1.0077	1.12609	0.0257095
AC007066.2	2.22361	1.07248	4.61029	0.0317106
SNHG1	1.04177	1.01464	1.06962	0.0023687
AL035461.2	1.08045	1.00953	1.15635	0.025504
AC105118.1	1.01158	1.00211	1.02114	0.0164306
AC004816.1	1.20591	1.07723	1.34997	0.00114555
LUCAT1	1.1787	1.0945	1.26938	1.37405e-05
TGFB2-AS1	1.09016	1.01771	1.16778	0.013887
HMGN3-AS1	2.14799	1.43587	3.2133	0.000198875
LINC02313	1.11963	1.00404	1.24853	0.0421086
AC012676.1	1.82553	1.13183	2.94439	0.0135988
PTOV1-AS1	1.26132	1.06896	1.48829	0.00596294
ZFPM2-AS1	1.09609	1.05617	1.13752	1.25425e-06
ZNF232-AS1	1.07715	1.00565	1.15372	0.0339377
AC145207.8	1.17867	1.08355	1.28215	0.000128664
SNHG4	1.48215	1.28392	1.71099	7.80591e-08
SNHG7	1.02862	1.00397	1.05387	0.0225891
LINC00942	1.03677	1.02071	1.05307	5.76731e-06
AL049840.3	1.8456	1.23985	2.74729	0.00253454
LINC01224	1.86891	1.411	2.47542	1.29473e-05
KDM4A-AS1	2.85183	1.89762	4.28586	4.60407e-07
NRSN2-AS1	1.24467	1.05164	1.47314	0.0109093
AC091057.1	2.42443	1.29013	4.55602	0.00593399
AL050341.2	1.14033	1.04254	1.2473	0.00409673
SREBF2-AS1	1.45836	1.16984	1.81804	0.000794755
CYTOR	1.0349	1.01142	1.05893	0.00339485
AC026356.1	4.25643	2.29654	7.88889	4.20673e-06
ZNF529-AS1	1.28833	1.03465	1.60422	0.0235492
OTUD6B-AS1	1.11937	1.02261	1.22528	0.0144955
GSEC	1.71455	1.3278	2.21396	3.56857e-05
MKLN1-AS	3.37753	2.28509	4.99223	1.02638e-09
PRRT3-AS1	1.09534	1.0419	1.15153	0.000359635
ZNF32-AS2	1.74454	1.05059	2.89685	0.0314995
AL606489.1	1.19897	1.04294	1.37834	0.0107386
FAM111A-DT	1.51019	1.10346	2.06683	0.010027
